# Supplementary material for: Phase equilibria of symmetric Lennard-Jones mixtures and a look at the transport properties near the upper critical solution temperature
Source: Royal Society of Chemistry journal article supplement (doi:10.1039/d3cp01434g), 2023-01-01
Supplement: d3cp01434g1.pdf [file d3cp01434g1.pdf]

# Supporting Information:

## Phase equilibria of symmetric Lennard-Jones mixtures and a look at the transport properties near the upper critical solution temperature

Ivan Antolović,<sup>†</sup> Jens Staubach,<sup>‡</sup> Simon Stephan,<sup>‡</sup> and Jadran Vrabec<sup>\*,†</sup>

<sup>†</sup>*Thermodynamics, Technical University Berlin, 10587 Berlin, Germany*

<sup>‡</sup>*Laboratory of Engineering Thermodynamics (LTD), RPTU Kaiserslautern, Kaiserslautern, Germany.*

E-mail: vrabec@tu-berlin.de

Phone: +49 30 314 22755

## 1 Technical details of molecular simulations

### 1.1 Simulation details

All molecular simulations were carried out with the tool *ms2*.<sup>S1-S4</sup> Assuming a cubic volume with periodic boundary conditions that contains between 1000 and 20,000 molecules, the intermolecular interactions were evaluated explicitly within a cutoff radius of  $4\sigma$ , applying analytical long-range corrections.<sup>S5</sup> In case of molecular dynamics (MD) simulation, Newton's equations of motion were solved with a fifth-order Gear predictor-corrector numerical integrator and an integration time step of  $\Delta t^* = 0.9$  to  $2.7 \cdot 10^{-3}$ .

## 1.2 LLE and vapor phase simulations

LLE and vapor phase simulations were carried out using Monte Carlo (MC) simulations in the isobaric-isothermal ( $NpT$ ) ensemble containing 1000 to 4000 molecules, with an average of  $8 \cdot 10^5$  production cycles. The chemical potential was sampled with Widom's insertion method,<sup>S6</sup> using 3000 test particles per cycle.

## 1.3 VLE simulations

VLE simulations were conducted in two subsequent steps: (1) liquid run and (2) vapor run, following the grand equilibrium method by Vrabec and Hasse<sup>S7</sup>. The liquid run was carried out with MD simulation in the  $NpT$  ensemble, followed by the vapor run using MC simulation in the pseudo-grand canonical ( $\mu VT$ ) ensemble. Both phases consisted of 1372 molecules and were sampled for  $8 \cdot 10^5$  production steps.

## 1.4 Transport property simulations

Transport property simulations were performed in two consecutive steps: (1) MC simulation in the  $NpT$  ensemble to obtain the density and (2) MD simulation in the canonic ( $NVT$ ) ensemble to obtain the diffusion coefficients, shear viscosity and thermal conductivity, as well as the thermodynamic factor through Kirkwood-Buff integrals (KBI).<sup>S8</sup> Simulations in the  $NVT$  ensemble were first equilibrated over  $1.5 \cdot 10^5$  time steps, followed by a production run of  $5 \cdot 10^6$  time steps. To account for finite size effects, up to four system sizes were investigated containing 2500, 5000, 10,000 and 20,000 molecules, respectively.

## 2 Equilibrium properties

### 2.1 Helmholtz energy derivatives

The molar Helmholtz energy  $a = F/N$  can be used to determine all thermodynamic equilibrium properties, such as the isochoric heat capacity  $c_v$ , speed of sound  $w$  or the Joule-Thomson coefficient  $\mu_{JT}$ . It also serves as the basis for the development of EOS.<sup>S9</sup> The formalism for the calculation of thermodynamic properties from Helmholtz energy-based EOS is described in detail in Refs. S10, S11. The partial derivatives of the reduced Helmholtz energy  $\alpha = a/(k_B T)$  can be expressed as

$$\mathcal{A}_{mn} = \mathcal{A}_{mn}^o + \mathcal{A}_{mn}^r = \tau^m \rho^n \frac{\partial^{m+n} (\alpha^o + \alpha^r)}{\partial \tau^m \partial \rho^n}, \quad (1)$$

where  $m$  and  $n$  denote the order of derivation with respect to  $\tau = 1/T$  and  $\rho$ . The reduced Helmholtz energy derivatives are usually split into an ideal gas  $\mathcal{A}_{mn}^o$  and a residual  $\mathcal{A}_{mn}^r$  contribution. Direct sampling of the latter is implemented in *ms2* and allows to extend this study to further properties near the critical solution point.

$$\text{Reduced ideal gas Helmholtz energy : } \mathcal{A}_{00}^o = \ln \rho + 1.5 \ln \tau + c_1 \tau + c_2. \quad (2)$$

$$\text{Reduced residual Helmholtz energy : } \mathcal{A}_{00}^r = \frac{\sum x_i \mu_i^r}{RT} - \mathcal{A}_{01}^r. \quad (3)$$

### 2.2 Thermodynamic factor

The thermodynamic factor is a key component for the description of both phase equilibria and mass transport properties. It can be used to identify the composition where phase stability ceases to exist ( $\Gamma = 0$ ) and allows to determine the critical solution point, as demonstrated in this work. Moreover, it is also relevant for diffusive mass transport processes, since it

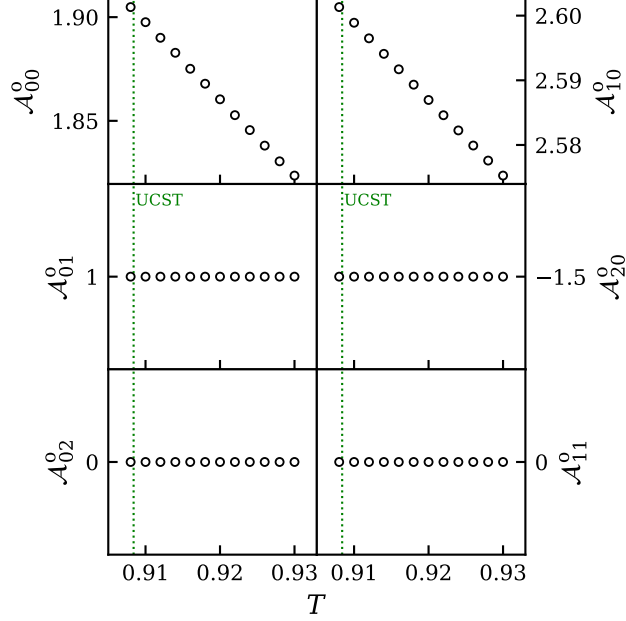

Figure S1: Ideal gas Helmholtz energy derivatives  $\mathcal{A}_{mn}^o$  near the critical solution point of the equimolar mixture C at  $p = 0.0724$ .

relates the Fick and MS diffusion coefficients.

Values for  $\Gamma$  were obtained in this work through Kirkwood-Buff integrals (KBI)<sup>S8</sup>

$$G_{ij} = \int_0^\infty (g_{ij}(r) - 1) 4\pi r^2 dr \quad (4)$$

$$\approx \int_0^{2R} (g_{ij}(r) - 1) w(r, x) dr, \quad (5)$$

where  $g_{ij}(r)$  is the radial distribution function (RDF) integrated over a spherical volume. Since the infinite integration limit in Eq. (4) cannot be reached with molecular simulations because they are limited to finite radii  $R$ , a geometric weight function  $w(r, x)$  was proposed by Krüger et al.<sup>S12</sup>

$$w(r, x) = 4\pi r^2 \left( 1 - \frac{3x}{2} + \frac{x^3}{2} \right), \quad (6)$$

where  $x = r/2R$ . Like the self-diffusion coefficient, the integrals  $G_{ij}$  scale linearly with the inverse of the system size  $1/R$ . Thus, the extrapolation to the thermodynamic limit ( $1/R \rightarrow 0$ ) is straightforward. Three types of RDF were used to calculate the KBI: the

standard RDF, and two modifications – RDF corrected according to Ganguly and van der Vegt<sup>S13</sup> (vdV) and a shifted version thereof (vdV + shf).<sup>S14</sup> This amounts to three values for  $\Gamma$  per simulation run, plus three additional values for their extrapolated versions. The thermodynamic factor of a binary mixture was then calculated by

$$\Gamma = \frac{1}{1 + x_1 x_2 \rho (G_{11} + G_{22} - 2G_{12})}. \quad (7)$$

### 3 Transport properties

Transport properties were obtained with equilibrium molecular dynamics (MD) simulations, mainly with the Einstein formalism. Three types of diffusion coefficients were considered: (1) self-diffusion  $D_i$ , (2) Maxwell-Stefan (MS)  $\mathcal{D}_{ij}$  and (3) Fick diffusion  $D_{ij}$ . Shear viscosity  $\eta$ , thermal conductivity  $\lambda$  and thermodynamic factor  $\Gamma$  were investigated, as the latter is an important auxiliary quantity to convert between  $\mathcal{D}_{ij}$  and  $D_{ij}$ .

#### 3.1 Self-diffusion coefficient

Self-diffusion is based on the Brownian motion of individual molecules in absence of driving forces. The self-diffusion coefficient of species  $i$   $D_i$  is given by the Einstein relation

$$D_i = \lim_{\Delta t \rightarrow \infty} \frac{1}{6N_i \Delta t} \left\langle \sum_{k=1}^{N_i} \phi_{k,i}^2 \right\rangle, \quad (8)$$

with the displacement

$$\phi_{k,i} = \mathbf{r}_{k,i}(t + \Delta t) - \mathbf{r}_{k,i}(t), \quad (9)$$

where  $N_i$  is the number of molecules of species  $i$ ,  $\mathbf{r}_{k,i}(t)$  is the position vector of molecule  $k$  of species  $i$  and the angle brackets  $\langle \dots \rangle$  denote the ensemble average.

### 3.2 Maxwell-Stefan and Fick diffusion

MS and Fick diffusion both describe the collective motion of molecular systems. However, they differ in the underlying driving force that is assumed for the diffusive flux. Fick diffusion assumes the concentration gradient to be the cause of mass transport, whereas MS assumes the chemical potential gradient. From a physical standpoint, the MS approach is preferable. Krishna<sup>S15</sup> demonstrated its advantages, being unambiguous and more general. For a binary mixture, the MS diffusion coefficient can be obtained by

$$D_{ij} = \frac{x_2}{x_1} \Lambda_{11} + \frac{x_1}{x_2} \Lambda_{22} - 2\Lambda_{12}, \quad (10)$$

on the basis of the Onsager coefficients

$$\Lambda_{ij} = \lim_{\Delta t \rightarrow \infty} \frac{1}{6N\Delta t} \left\langle \sum_{k=1}^{N_i} \phi_{k,i} \sum_{l=1}^{N_j} \phi_{l,j} \right\rangle, \quad (11)$$

where  $N_i$  and  $N_j$  are the number of molecules of component  $i$  and  $j$ , respectively, and  $N$  is the total number of molecules. The Onsager coefficients are given by the cross-correlation of the displacement (9) between species  $i$  and  $j$ .

Despite the advantages of the MS diffusion framework, Fick's law is still the most common approach for describing diffusive mass transport because of its simple structure and the experimental accessibility of the according coefficient. The conversion between the MS and Fick diffusion coefficients can be achieved through the thermodynamic factor  $\Gamma$ . For binary mixtures

$$D_{ij} = D_{ij} \cdot \Gamma. \quad (12)$$

### 3.3 Shear viscosity and thermal conductivity

The shear viscosity  $\eta$  was obtained through the Einstein relation

$$\eta = \lim_{\Delta t \rightarrow \infty} \frac{1}{2Vk_B T} \left\langle \left( \int_t^{t+\Delta t} J_p^{\alpha\beta}(\tau) d\tau \right)^2 \right\rangle, \quad (13)$$

where  $V$  is the molar volume,  $\alpha, \beta = x, y, z$  are Cartesian coordinates and  $J_p^{\alpha\beta}$  is an off-diagonal element  $J_p^{x,y}, J_p^{x,z}, J_p^{y,z}$  of the stress tensor.<sup>S4</sup>

The thermal conductivity  $\lambda$  was obtained by means of the Green-Kubo formalism

$$\lambda = \frac{1}{Vk_B T^2} \int_0^\infty \langle J_q^x(t) \cdot J_q^x(0) \rangle dt, \quad (14)$$

where  $J_q^x$  are the elements of the microscopic heat flow.<sup>S2</sup>

## 4 Results

### 4.1 Equation for $\xi_{\text{EOS}}$

The linear function modeling the temperature dependence of the binary interaction parameter needed for the EOS of Kolafa and Nezbeda<sup>S16</sup> is given as

$$\xi_{\text{EOS}} = c_1 + c_2 T. \quad (15)$$

Its parameters  $c_1$  and  $c_2$  were fitted for each mixture and temperature range individually and are reported in Table S1.

Table S1: Parameters for the calculation of  $\xi_{\text{EOS}}$  by Eq. (15) for a given mixture.

| Mixture | $c_1$     | $c_2$      |
|---------|-----------|------------|
| A       | 0.6046337 | 0.02372236 |
| B       | 0.6866463 | 0.08538621 |
| C       | 0.7621365 | 0.05930221 |
| D       | 0.8286502 | 0.04253047 |

## 4.2 Deviations

The temperature dependence is qualitatively the same for all three mixtures of type II: for temperatures below the  $T_{\text{CEP}}$ ,  $\xi_{\text{EOS}}$  increases linearly with rising temperature. For temperatures above  $T_{\text{CEP}}$ ,  $\xi_{\text{EOS}}$  shows only a minor temperature dependence. Figure S2 shows the relative deviation between  $\xi_{\text{EOS}}$  and  $\xi$  as a function of the temperature reduced by  $T_{\text{CEP}}$  for all three studied type II mixtures (B,C,D). Overall, mixtures of type II show an increasing deviation between  $\xi_{\text{EOS}}$  and  $\xi$ . With decreasing  $\xi$ , the relative deviation between  $\xi_{\text{EOS}}$  and  $\xi$  increases. Hence, the predictive capabilities of the EOS decline.

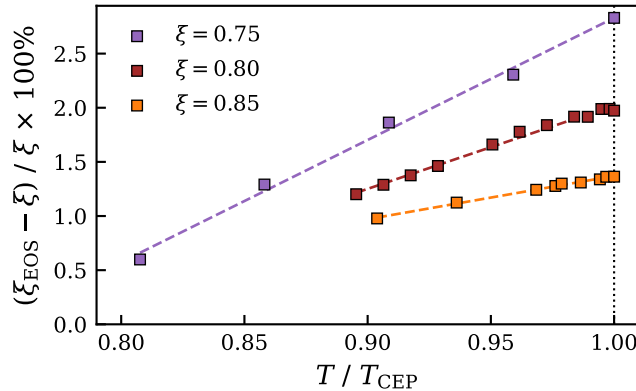

Figure S2: Relative deviation between the binary interaction parameter  $\xi_{\text{EOS}}$  of the EOS by Kolafa and Nezbeda<sup>S16</sup> and its true value  $\xi$  as a function of temperature  $T$  reduced by the temperature of the critical endpoint (CEP)  $T_{\text{CEP}}$ . Results were obtained by fitting  $\xi_{\text{EOS}}$  to VLE and LLE simulation data for mixtures B (purple), C (dark red) and D (orange).



### 4.3 Simulation results

The simulation results for the studied mixtures are listed below. The nomenclature of the mixtures corresponds to

| Mixture | A    | B    | C    | D    | E    |
|---------|------|------|------|------|------|
| $\xi$   | 0.60 | 0.75 | 0.80 | 0.85 | 1.20 |

All thermodynamic properties were reduced to dimensionless numbers on the order of unity. For brevity, the asterisk is omitted in the following with the understanding that reduced quantities are reported throughout.

#### 4.3.1 LLE

Table S2: Simulation results for the liquid-liquid equilibrium of mixtures A to E. Temperature  $T$ , pressure  $p$  and mole fraction  $x_1$  are tabulated, where L1 and L2 denote the two liquid phases.

| $\xi$ | $T$  | $p$    | $x_1^{L1}$ | $x_1^{L2}$ | $\xi$ | $T$  | $p$    | $x_1^{L1}$ | $x_1^{L2}$ |
|-------|------|--------|------------|------------|-------|------|--------|------------|------------|
| 0.60  | 1.10 | 0.1173 | 0.0939     | 0.9061     | 0.60  | 1.16 | 0.2803 | 0.1193     | 0.8807     |
| 0.60  | 1.10 | 0.1499 | 0.0824     | 0.9176     | 0.60  | 1.16 | 0.3129 | 0.1091     | 0.8909     |
| 0.60  | 1.10 | 0.1825 | 0.0754     | 0.9246     | 0.60  | 1.18 | 0.1173 | 0.5000     | 0.5000     |
| 0.60  | 1.10 | 0.2151 | 0.0697     | 0.9303     | 0.60  | 1.18 | 0.1499 | 0.5000     | 0.5000     |
| 0.60  | 1.10 | 0.2477 | 0.0654     | 0.9346     | 0.60  | 1.18 | 0.1825 | 0.5000     | 0.5000     |
| 0.60  | 1.12 | 0.1173 | 0.1503     | 0.8497     | 0.60  | 1.18 | 0.2151 | 0.5000     | 0.5000     |
| 0.60  | 1.12 | 0.1499 | 0.1126     | 0.8874     | 0.60  | 1.18 | 0.2477 | 0.2046     | 0.7954     |
| 0.60  | 1.12 | 0.1825 | 0.0974     | 0.9026     | 0.60  | 1.18 | 0.2803 | 0.1629     | 0.8371     |
| 0.60  | 1.12 | 0.2151 | 0.0878     | 0.9122     | 0.60  | 1.18 | 0.3129 | 0.1396     | 0.8604     |
| 0.60  | 1.12 | 0.2477 | 0.0813     | 0.9187     | 0.60  | 1.18 | 0.3455 | 0.1265     | 0.8735     |
| 0.60  | 1.14 | 0.1173 | 0.5000     | 0.5000     | 0.60  | 1.18 | 0.3781 | 0.1157     | 0.8843     |
| 0.60  | 1.14 | 0.1499 | 0.1956     | 0.8044     | 0.60  | 1.18 | 0.4107 | 0.1080     | 0.8920     |
| 0.60  | 1.14 | 0.1825 | 0.1355     | 0.8645     | 0.60  | 1.20 | 0.1173 | 0.5000     | 0.5000     |
| 0.60  | 1.14 | 0.2151 | 0.1146     | 0.8854     | 0.60  | 1.20 | 0.1499 | 0.5000     | 0.5000     |
| 0.60  | 1.14 | 0.2477 | 0.1021     | 0.8979     | 0.60  | 1.20 | 0.1825 | 0.5000     | 0.5000     |
| 0.60  | 1.16 | 0.1173 | 0.5000     | 0.5000     | 0.60  | 1.20 | 0.2151 | 0.5000     | 0.5000     |
| 0.60  | 1.16 | 0.1499 | 0.5000     | 0.5000     | 0.60  | 1.20 | 0.2477 | 0.5000     | 0.5000     |
| 0.60  | 1.16 | 0.1825 | 0.2904     | 0.7096     | 0.60  | 1.20 | 0.2803 | 0.2601     | 0.7399     |
| 0.60  | 1.16 | 0.2151 | 0.1641     | 0.8359     | 0.60  | 1.20 | 0.3129 | 0.1917     | 0.8083     |
| 0.60  | 1.16 | 0.2477 | 0.1355     | 0.8645     | 0.60  | 1.20 | 0.3455 | 0.1652     | 0.8348     |
| 0.60  | 1.16 | 0.3455 | 0.0998     | 0.9002     | 0.60  | 1.20 | 0.3781 | 0.1459     | 0.8541     |
| 0.60  | 1.16 | 0.3781 | 0.0940     | 0.9060     | 0.60  | 1.20 | 0.4107 | 0.1338     | 0.8662     |
| 0.60  | 1.16 | 0.4107 | 0.0889     | 0.9111     |       |      |        |            |            |

Table S2: Simulation results for the liquid-liquid equilibrium of mixtures A to E. Temperature  $T$ , pressure  $p$  and mole fraction  $x_1$  are tabulated, where L1 and L2 denote the two liquid phases.

| $\xi$ | $T$  | $p$    | $x_1^{L1}$ | $x_1^{L2}$ | $\xi$ | $T$  | $p$    | $x_1^{L1}$ | $x_1^{L2}$ |
|-------|------|--------|------------|------------|-------|------|--------|------------|------------|
| 0.75  | 0.80 | 0.0724 | 0.0373     | 0.9627     | 0.75  | 0.90 | 0.0724 | 0.1029     | 0.8971     |
| 0.75  | 0.80 | 0.1000 | 0.0373     | 0.9627     | 0.75  | 0.90 | 0.1000 | 0.1008     | 0.8992     |
| 0.75  | 0.80 | 0.1253 | 0.0377     | 0.9623     | 0.75  | 0.90 | 0.1253 | 0.0982     | 0.9018     |
| 0.75  | 0.80 | 0.1499 | 0.0371     | 0.9629     | 0.75  | 0.90 | 0.1499 | 0.0970     | 0.9030     |
| 0.75  | 0.85 | 0.0724 | 0.0634     | 0.9366     | 0.75  | 0.95 | 0.0724 | 0.1743     | 0.8257     |
| 0.75  | 0.85 | 0.1000 | 0.0622     | 0.9378     | 0.75  | 0.95 | 0.1000 | 0.1679     | 0.8321     |
| 0.75  | 0.85 | 0.1253 | 0.0604     | 0.9396     | 0.75  | 0.95 | 0.1253 | 0.1638     | 0.8362     |
| 0.75  | 0.85 | 0.1499 | 0.0599     | 0.9401     | 0.75  | 0.95 | 0.1499 | 0.1588     | 0.8412     |
| 0.80  | 0.80 | 0.0724 | 0.1020     | 0.8980     | 0.80  | 0.90 | 0.0724 | 0.3610     | 0.6390     |
| 0.80  | 0.81 | 0.0724 | 0.1189     | 0.8811     | 0.80  | 0.90 | 0.0869 | 0.3431     | 0.6569     |
| 0.80  | 0.82 | 0.0724 | 0.1314     | 0.8686     | 0.80  | 0.90 | 0.1014 | 0.3392     | 0.6608     |
| 0.80  | 0.83 | 0.0724 | 0.1454     | 0.8546     | 0.80  | 0.90 | 0.0036 | 0.5000     | 0.5000     |
| 0.80  | 0.84 | 0.0724 | 0.1613     | 0.8387     | 0.80  | 0.90 | 0.0072 | 0.4999     | 0.5001     |
| 0.80  | 0.85 | 0.0036 | 0.1952     | 0.8048     | 0.80  | 0.90 | 0.0145 | 0.4683     | 0.5317     |
| 0.80  | 0.85 | 0.0072 | 0.1936     | 0.8064     | 0.80  | 0.90 | 0.0181 | 0.5000     | 0.5000     |
| 0.80  | 0.85 | 0.0145 | 0.1924     | 0.8076     | 0.80  | 0.90 | 0.0217 | 0.4502     | 0.5498     |
| 0.80  | 0.85 | 0.0290 | 0.1902     | 0.8098     | 0.80  | 0.90 | 0.0254 | 0.4616     | 0.5384     |
| 0.80  | 0.85 | 0.0435 | 0.1891     | 0.8109     | 0.80  | 0.90 | 0.0290 | 0.4477     | 0.5523     |
| 0.80  | 0.85 | 0.0579 | 0.1871     | 0.8129     | 0.80  | 0.90 | 0.0435 | 0.4079     | 0.5921     |
| 0.80  | 0.85 | 0.0724 | 0.1847     | 0.8153     | 0.80  | 0.90 | 0.0579 | 0.3955     | 0.6045     |
| 0.80  | 0.85 | 0.0869 | 0.1824     | 0.8176     | 0.80  | 0.90 | 0.0724 | 0.3723     | 0.6277     |
| 0.80  | 0.85 | 0.1014 | 0.1777     | 0.8223     | 0.80  | 0.90 | 0.0869 | 0.3608     | 0.6392     |
| 0.80  | 0.86 | 0.0290 | 0.2102     | 0.7898     | 0.80  | 0.90 | 0.1014 | 0.3548     | 0.6452     |
| 0.80  | 0.86 | 0.0435 | 0.2082     | 0.7918     | 0.80  | 0.90 | 0.0217 | 0.5000     | 0.5000     |
| 0.80  | 0.86 | 0.0579 | 0.2053     | 0.7947     | 0.80  | 0.90 | 0.0254 | 0.4717     | 0.5283     |
| 0.80  | 0.86 | 0.0724 | 0.2007     | 0.7993     | 0.80  | 0.90 | 0.0290 | 0.4660     | 0.5340     |
| 0.80  | 0.87 | 0.0290 | 0.2386     | 0.7614     | 0.80  | 0.90 | 0.0435 | 0.4300     | 0.5700     |
| 0.80  | 0.87 | 0.0435 | 0.2382     | 0.7618     | 0.80  | 0.90 | 0.0579 | 0.4122     | 0.5878     |
| 0.80  | 0.87 | 0.0579 | 0.2350     | 0.7650     | 0.80  | 0.90 | 0.0724 | 0.3892     | 0.6108     |
| 0.80  | 0.87 | 0.0724 | 0.2254     | 0.7746     | 0.80  | 0.91 | 0.0036 | 0.5000     | 0.5000     |
| 0.80  | 0.88 | 0.0290 | 0.2725     | 0.7275     | 0.80  | 0.91 | 0.0072 | 0.5000     | 0.5000     |
| 0.80  | 0.88 | 0.0435 | 0.2706     | 0.7294     | 0.80  | 0.91 | 0.0145 | 0.5000     | 0.5000     |
| 0.80  | 0.88 | 0.0579 | 0.2671     | 0.7329     | 0.80  | 0.91 | 0.0181 | 0.4996     | 0.5004     |
| 0.80  | 0.88 | 0.0724 | 0.2536     | 0.7464     | 0.80  | 0.91 | 0.0217 | 0.5000     | 0.5000     |
| 0.80  | 0.89 | 0.0181 | 0.3333     | 0.6667     | 0.80  | 0.91 | 0.0254 | 0.4955     | 0.5045     |
| 0.80  | 0.89 | 0.0217 | 0.3212     | 0.6788     | 0.80  | 0.91 | 0.0290 | 0.4855     | 0.5146     |
| 0.80  | 0.89 | 0.0254 | 0.3222     | 0.6778     | 0.80  | 0.91 | 0.0435 | 0.4362     | 0.5638     |
| 0.80  | 0.89 | 0.0290 | 0.3171     | 0.6829     | 0.80  | 0.91 | 0.0579 | 0.4085     | 0.5915     |
| 0.80  | 0.89 | 0.0435 | 0.3177     | 0.6823     | 0.80  | 0.91 | 0.0724 | 0.3995     | 0.6005     |
| 0.80  | 0.89 | 0.0579 | 0.3049     | 0.6951     | 0.80  | 0.91 | 0.0869 | 0.3791     | 0.6209     |
| 0.80  | 0.89 | 0.0724 | 0.2959     | 0.7041     | 0.80  | 0.91 | 0.1014 | 0.3706     | 0.6294     |
| 0.80  | 0.89 | 0.0869 | 0.2930     | 0.7070     | 0.80  | 0.91 | 0.0724 | 0.4992     | 0.5007     |
| 0.80  | 0.89 | 0.1014 | 0.2848     | 0.7152     | 0.80  | 0.91 | 0.1086 | 0.4095     | 0.5905     |
| 0.80  | 0.90 | 0.0145 | 0.3679     | 0.6321     | 0.80  | 0.91 | 0.1449 | 0.3687     | 0.6313     |
| 0.80  | 0.90 | 0.0181 | 0.3591     | 0.6409     | 0.80  | 0.91 | 0.1811 | 0.3446     | 0.6554     |

Table S2: Simulation results for the liquid-liquid equilibrium of mixtures A to E. Temperature  $T$ , pressure  $p$  and mole fraction  $x_1$  are tabulated, where L1 and L2 denote the two liquid phases.

| $\xi$ | $T$  | $p$    | $x_1^{L1}$ | $x_1^{L2}$ | $\xi$ | $T$  | $p$    | $x_1^{L1}$ | $x_1^{L2}$ |
|-------|------|--------|------------|------------|-------|------|--------|------------|------------|
| 0.80  | 0.90 | 0.0217 | 0.3436     | 0.6564     | 0.80  | 0.91 | 0.2173 | 0.3259     | 0.6741     |
| 0.80  | 0.90 | 0.0254 | 0.3528     | 0.6472     | 0.80  | 0.91 | 0.2535 | 0.3150     | 0.6850     |
| 0.80  | 0.90 | 0.0290 | 0.3486     | 0.6514     | 0.80  | 0.92 | 0.1086 | 0.5000     | 0.5000     |
| 0.80  | 0.90 | 0.0036 | 0.4350     | 0.5650     | 0.80  | 0.92 | 0.1449 | 0.4155     | 0.5845     |
| 0.80  | 0.90 | 0.0072 | 0.4272     | 0.5728     | 0.80  | 0.92 | 0.1811 | 0.3812     | 0.6188     |
| 0.80  | 0.90 | 0.0145 | 0.4167     | 0.5833     | 0.80  | 0.92 | 0.2173 | 0.3591     | 0.6409     |
| 0.80  | 0.90 | 0.0181 | 0.4099     | 0.5901     | 0.80  | 0.92 | 0.2535 | 0.3368     | 0.6632     |
| 0.80  | 0.90 | 0.0217 | 0.4098     | 0.5902     | 0.80  | 0.92 | 0.1449 | 0.5000     | 0.5000     |
| 0.80  | 0.90 | 0.0254 | 0.3958     | 0.6042     | 0.80  | 0.92 | 0.1811 | 0.4443     | 0.5557     |
| 0.80  | 0.90 | 0.0290 | 0.3934     | 0.6066     | 0.80  | 0.92 | 0.2173 | 0.3896     | 0.6104     |
| 0.80  | 0.90 | 0.0435 | 0.3809     | 0.6191     | 0.80  | 0.92 | 0.2535 | 0.3662     | 0.6338     |
| 0.80  | 0.90 | 0.0579 | 0.3657     | 0.6343     |       |      |        |            |            |
| 0.85  | 0.70 | 0.0025 | 0.1640     | 0.8360     | 0.85  | 0.76 | 0.0217 | 0.3444     | 0.6556     |
| 0.85  | 0.70 | 0.0033 | 0.1610     | 0.8390     | 0.85  | 0.76 | 0.0072 | 0.3583     | 0.6417     |
| 0.85  | 0.70 | 0.0045 | 0.1660     | 0.8340     | 0.85  | 0.76 | 0.0145 | 0.3541     | 0.6459     |
| 0.85  | 0.70 | 0.0059 | 0.1617     | 0.8383     | 0.85  | 0.76 | 0.0217 | 0.3555     | 0.6445     |
| 0.85  | 0.70 | 0.0077 | 0.1623     | 0.8377     | 0.85  | 0.77 | 0.0072 | 0.3734     | 0.6266     |
| 0.85  | 0.70 | 0.0097 | 0.1631     | 0.8369     | 0.85  | 0.77 | 0.0145 | 0.3627     | 0.6373     |
| 0.85  | 0.70 | 0.0120 | 0.1617     | 0.8383     | 0.85  | 0.77 | 0.0217 | 0.3637     | 0.6363     |
| 0.85  | 0.70 | 0.0146 | 0.1631     | 0.8369     | 0.85  | 0.77 | 0.0072 | 0.3802     | 0.6198     |
| 0.85  | 0.70 | 0.0175 | 0.1640     | 0.8360     | 0.85  | 0.77 | 0.0145 | 0.3806     | 0.6194     |
| 0.85  | 0.73 | 0.0033 | 0.2169     | 0.7831     | 0.85  | 0.77 | 0.0217 | 0.3842     | 0.6158     |
| 0.85  | 0.73 | 0.0045 | 0.2128     | 0.7872     | 0.85  | 0.77 | 0.0072 | 0.4133     | 0.5867     |
| 0.85  | 0.73 | 0.0059 | 0.2156     | 0.7844     | 0.85  | 0.77 | 0.0145 | 0.3873     | 0.6127     |
| 0.85  | 0.73 | 0.0077 | 0.2180     | 0.7820     | 0.85  | 0.77 | 0.0217 | 0.4082     | 0.5918     |
| 0.85  | 0.73 | 0.0097 | 0.2112     | 0.7888     | 0.85  | 0.77 | 0.0072 | 0.4387     | 0.5613     |
| 0.85  | 0.73 | 0.0120 | 0.2143     | 0.7857     | 0.85  | 0.77 | 0.0145 | 0.4400     | 0.5600     |
| 0.85  | 0.73 | 0.0146 | 0.2161     | 0.7839     | 0.85  | 0.77 | 0.0217 | 0.4120     | 0.5880     |
| 0.85  | 0.73 | 0.0175 | 0.2074     | 0.7926     | 0.85  | 0.77 | 0.0072 | 0.4597     | 0.5403     |
| 0.85  | 0.75 | 0.0045 | 0.2877     | 0.7123     | 0.85  | 0.77 | 0.0145 | 0.4576     | 0.5424     |
| 0.85  | 0.75 | 0.0059 | 0.2867     | 0.7133     | 0.85  | 0.77 | 0.0217 | 0.4217     | 0.5783     |
| 0.85  | 0.75 | 0.0077 | 0.3030     | 0.6970     | 0.85  | 0.78 | 0.0059 | 0.4883     | 0.5117     |
| 0.85  | 0.75 | 0.0097 | 0.2871     | 0.7129     | 0.85  | 0.78 | 0.0077 | 0.5000     | 0.5000     |
| 0.85  | 0.75 | 0.0120 | 0.2817     | 0.7183     | 0.85  | 0.78 | 0.0097 | 0.4527     | 0.5473     |
| 0.85  | 0.75 | 0.0146 | 0.2846     | 0.7154     | 0.85  | 0.78 | 0.0120 | 0.4529     | 0.5471     |
| 0.85  | 0.75 | 0.0175 | 0.2867     | 0.7133     | 0.85  | 0.78 | 0.0146 | 0.4830     | 0.5170     |
| 0.85  | 0.75 | 0.0072 | 0.3012     | 0.6988     | 0.85  | 0.78 | 0.0175 | 0.4998     | 0.5002     |
| 0.85  | 0.75 | 0.0145 | 0.2996     | 0.7004     | 0.85  | 0.78 | 0.0072 | 0.5000     | 0.5000     |
| 0.85  | 0.75 | 0.0217 | 0.2932     | 0.7068     | 0.85  | 0.78 | 0.0145 | 0.5000     | 0.5000     |
| 0.85  | 0.75 | 0.0072 | 0.3035     | 0.6965     | 0.85  | 0.78 | 0.0217 | 0.5000     | 0.5000     |
| 0.85  | 0.75 | 0.0145 | 0.3096     | 0.6904     | 0.85  | 0.78 | 0.0072 | 0.5000     | 0.5000     |
| 0.85  | 0.75 | 0.0217 | 0.3080     | 0.6920     | 0.85  | 0.78 | 0.0145 | 0.5000     | 0.5000     |
| 0.85  | 0.76 | 0.0072 | 0.3118     | 0.6882     | 0.85  | 0.78 | 0.0217 | 0.5000     | 0.5000     |
| 0.85  | 0.76 | 0.0145 | 0.3170     | 0.6830     | 0.85  | 0.78 | 0.0072 | 0.5000     | 0.5000     |
| 0.85  | 0.76 | 0.0217 | 0.3124     | 0.6876     | 0.85  | 0.78 | 0.0145 | 0.5000     | 0.5000     |

Table S2: Simulation results for the liquid-liquid equilibrium of mixtures A to E. Temperature  $T$ , pressure  $p$  and mole fraction  $x_1$  are tabulated, where L1 and L2 denote the two liquid phases.

| $\xi$ | $T$  | $p$    | $x_1^{L1}$ | $x_1^{L2}$ | $\xi$ | $T$  | $p$    | $x_1^{L1}$ | $x_1^{L2}$ |
|-------|------|--------|------------|------------|-------|------|--------|------------|------------|
| 0.85  | 0.76 | 0.0072 | 0.3285     | 0.6715     | 0.85  | 0.79 | 0.0072 | 0.5000     | 0.5000     |
| 0.85  | 0.76 | 0.0145 | 0.3215     | 0.6785     | 0.85  | 0.79 | 0.0145 | 0.5000     | 0.5000     |
| 0.85  | 0.76 | 0.0217 | 0.3246     | 0.6754     | 0.85  | 0.80 | 0.0077 | 0.5000     | 0.5000     |
| 0.85  | 0.76 | 0.0072 | 0.3337     | 0.6663     | 0.85  | 0.80 | 0.0097 | 0.5000     | 0.5000     |
| 0.85  | 0.76 | 0.0145 | 0.3298     | 0.6702     | 0.85  | 0.80 | 0.0120 | 0.5000     | 0.5000     |
| 0.85  | 0.76 | 0.0217 | 0.3257     | 0.6743     | 0.85  | 0.80 | 0.0146 | 0.5000     | 0.5000     |
| 0.85  | 0.76 | 0.0072 | 0.3537     | 0.6463     | 0.85  | 0.80 | 0.0175 | 0.5000     | 0.5000     |
| 0.85  | 0.76 | 0.0145 | 0.3449     | 0.6551     | 0.85  | 0.80 | 0.0724 | 0.5000     | 0.5000     |

### 4.3.2 VLLE

Table S3: Simulation results for the vapor-liquid-liquid equilibrium of mixtures A to D. Temperature  $T$ , pressure  $p$  and mole fraction  $x_1$  are tabulated, where V, L1 and L2 denote the vapor and the two liquid phases.

| $\xi$ | $T$  | $p$    | $x_1^{L1}$ | $x_1^{L2}$ | $x_1^V$ | $\xi$ | $T$  | $p$    | $x_1^{L1}$ | $x_1^{L2}$ | $x_1^V$ |
|-------|------|--------|------------|------------|---------|-------|------|--------|------------|------------|---------|
| 0.60  | 1.10 | 0.1131 | 0.0957     | 0.9043     | 0.5     | 0.80  | 0.87 | 0.0171 | 0.2442     | 0.7558     | 0.5     |
| 0.60  | 1.12 | 0.1341 | 0.1229     | 0.8771     | 0.5     | 0.80  | 0.88 | 0.0186 | 0.2793     | 0.7207     | 0.5     |
| 0.75  | 0.80 | 0.0092 | 0.0374     | 0.9626     | 0.5     | 0.80  | 0.89 | 0.0201 | 0.3257     | 0.6743     | 0.5     |
| 0.75  | 0.85 | 0.0151 | 0.0660     | 0.9340     | 0.5     | 0.80  | 0.90 | 0.0217 | 0.4076     | 0.5924     | 0.5     |
| 0.75  | 0.90 | 0.0236 | 0.1067     | 0.8933     | 0.5     |       |      |        |            |            |         |
| 0.75  | 0.95 | 0.0350 | 0.1813     | 0.8187     | 0.5     | 0.85  | 0.70 | 0.0025 | 0.1629     | 0.8371     | 0.5     |
|       |      |        |            |            |         | 0.85  | 0.73 | 0.0035 | 0.2163     | 0.7837     | 0.5     |
| 0.80  | 0.85 | 0.0144 | 0.1931     | 0.8069     | 0.5     | 0.85  | 0.75 | 0.0047 | 0.2910     | 0.7090     | 0.5     |
| 0.80  | 0.86 | 0.0158 | 0.2136     | 0.7864     | 0.5     | 0.85  | 0.78 | 0.0061 | 0.4773     | 0.5227     | 0.5     |

### 4.3.3 Azeotropic line

Table S4: Simulation results for the azeotropic line of mixtures B to E. Temperature  $T$ , pressure  $p$ , density  $\rho$  and mole fraction  $x_1$  are tabulated, where V and L denote the vapor and liquid phase, respectively.

| $\xi$ | $T$  | $x_1^L$ | $x_1^V$ | err    | $p$    | err    | $\rho^L$ | err    | $\rho^V$ | err    |
|-------|------|---------|---------|--------|--------|--------|----------|--------|----------|--------|
| 0.75  | 1.03 | 0.5000  | 0.4998  | 0.0011 | 0.0576 | 0.0001 | 0.5954   | 0.0004 | 0.0806   | 0.0001 |
| 0.75  | 1.06 | 0.5000  | 0.5015  | 0.0012 | 0.0684 | 0.0001 | 0.5648   | 0.0006 | 0.0994   | 0.0002 |
| 0.75  | 1.09 | 0.5000  | 0.5007  | 0.0013 | 0.0809 | 0.0001 | 0.5325   | 0.0008 | 0.1247   | 0.0002 |
| 0.75  | 1.12 | 0.5000  | 0.5009  | 0.0013 | 0.0955 | 0.0002 | 0.4864   | 0.0010 | 0.1626   | 0.0003 |
| 0.75  | 1.13 | 0.5000  | 0.5017  | 0.0014 | 0.0988 | 0.0002 | 0.4738   | 0.0017 | 0.1734   | 0.0003 |
|       |      |         |         |        |        |        |          |        |          |        |
| 0.80  | 0.95 | 0.5000  | 0.5020  | 0.0012 | 0.0310 | 0.0001 | 0.6745   | 0.0002 | 0.0404   | 0.0001 |
| 0.80  | 1.00 | 0.5000  | 0.4989  | 0.0012 | 0.0428 | 0.0001 | 0.6388   | 0.0003 | 0.0564   | 0.0001 |

Table S4: Simulation results for the azeotropic line of mixtures B to E. Temperature  $T$ , pressure  $p$ , density  $\rho$  and mole fraction  $x_1$  are tabulated, where V and L denote the vapor and liquid phase, respectively.

| $\xi$ | $T$  | $x_1^L$ | $x_1^V$ | err    | $p$    | err    | $\rho^L$ | err    | $\rho^V$ | err    |
|-------|------|---------|---------|--------|--------|--------|----------|--------|----------|--------|
| 0.80  | 1.05 | 0.5000  | 0.5005  | 0.0010 | 0.0573 | 0.0001 | 0.5982   | 0.0004 | 0.0780   | 0.0001 |
| 0.80  | 1.10 | 0.5000  | 0.5011  | 0.0010 | 0.0753 | 0.0001 | 0.5501   | 0.0005 | 0.1092   | 0.0002 |
| 0.80  | 1.15 | 0.5000  | 0.4997  | 0.0013 | 0.0967 | 0.0002 | 0.4859   | 0.0014 | 0.1571   | 0.0003 |
| 0.85  | 0.95 | 0.5000  | 0.4988  | 0.0012 | 0.0271 | 0.0000 | 0.6884   | 0.0002 | 0.0344   | 0.0001 |
| 0.85  | 1.00 | 0.5000  | 0.5005  | 0.0012 | 0.0376 | 0.0001 | 0.6556   | 0.0002 | 0.0481   | 0.0001 |
| 0.85  | 1.05 | 0.5000  | 0.4987  | 0.0010 | 0.0509 | 0.0001 | 0.6195   | 0.0002 | 0.0665   | 0.0001 |
| 0.85  | 1.10 | 0.5000  | 0.5019  | 0.0010 | 0.0668 | 0.0001 | 0.5774   | 0.0004 | 0.0909   | 0.0001 |
| 0.85  | 1.15 | 0.5000  | 0.4989  | 0.0011 | 0.0856 | 0.0001 | 0.5236   | 0.0006 | 0.1252   | 0.0002 |
| 0.85  | 1.19 | 0.5000  | 0.4981  | 0.0011 | 0.1040 | 0.0002 | 0.4605   | 0.0020 | 0.1711   | 0.0003 |
| 1.20  | 1.15 | 0.5000  | 0.4998  | 0.0010 | 0.0363 | 0.0001 | 0.6771   | 0.0002 | 0.0389   | 0.0001 |
| 1.20  | 1.20 | 0.5000  | 0.5011  | 0.0011 | 0.0475 | 0.0001 | 0.6492   | 0.0002 | 0.0512   | 0.0001 |
| 1.20  | 1.25 | 0.5000  | 0.4996  | 0.0008 | 0.0611 | 0.0001 | 0.6186   | 0.0002 | 0.0674   | 0.0001 |
| 1.20  | 1.30 | 0.5000  | 0.5002  | 0.0009 | 0.0764 | 0.0001 | 0.5833   | 0.0003 | 0.0867   | 0.0001 |
| 1.20  | 1.35 | 0.5000  | 0.5002  | 0.0009 | 0.0952 | 0.0002 | 0.5424   | 0.0005 | 0.1149   | 0.0002 |
| 1.20  | 1.40 | 0.5000  | 0.5009  | 0.0010 | 0.1166 | 0.0002 | 0.4876   | 0.0009 | 0.1542   | 0.0003 |

#### 4.3.4 Transport properties

Table S5: Simulation results for the transport properties near the critical solution point of the equimolar mixture C at  $p=0.0724$ . Temperature  $T$ , density  $\rho$ , MS  $D_{ij}^\infty$  and self-diffusion coefficient  $D_i$  as well as the shear viscosity  $\eta$  and thermal conductivity  $\lambda$  are tabulated. Results correspond to four system sizes  $N = 2500, 5000, 10,000$  and  $20,000$ .

| $T$        | $\rho$ | err    | $D_i$  | err    | $D_{ij}^\infty$ | err    | $\eta$ | err    | $\lambda$ | err    |
|------------|--------|--------|--------|--------|-----------------|--------|--------|--------|-----------|--------|
| $N = 2500$ |        |        |        |        |                 |        |        |        |           |        |
| 0.906      | 0.7124 | 0.0001 | 0.0989 | 0.0002 | 0.1919          | 0.0092 | 1.1198 | 0.0814 | 5.8840    | 1.3254 |
| 0.908      | 0.7109 | 0.0001 | 0.1002 | 0.0002 | 0.1997          | 0.0090 | 1.1380 | 0.1037 | 3.8474    | 1.2579 |
| 0.910      | 0.7098 | 0.0001 | 0.1009 | 0.0002 | 0.1877          | 0.0090 | 1.1536 | 0.0988 | 6.8937    | 1.3200 |
| 0.912      | 0.7085 | 0.0001 | 0.1016 | 0.0002 | 0.1984          | 0.0089 | 1.2019 | 0.0933 | 4.6104    | 1.2756 |
| 0.914      | 0.7074 | 0.0001 | 0.1025 | 0.0002 | 0.1830          | 0.0100 | 1.1806 | 0.1393 | 6.7208    | 1.8328 |
| 0.916      | 0.7060 | 0.0001 | 0.1039 | 0.0002 | 0.1881          | 0.0093 | 1.2583 | 0.0948 | 3.0301    | 1.0770 |
| 0.918      | 0.7049 | 0.0001 | 0.1045 | 0.0002 | 0.2078          | 0.0116 | 1.2069 | 0.0958 | 3.7291    | 1.2774 |
| 0.920      | 0.7035 | 0.0001 | 0.1051 | 0.0002 | 0.1794          | 0.0084 | 1.3363 | 0.1190 | 5.0717    | 1.2685 |
| 0.922      | 0.7021 | 0.0001 | 0.1060 | 0.0002 | 0.1866          | 0.0084 | 1.2053 | 0.0898 | 4.6970    | 1.1791 |
| 0.924      | 0.7010 | 0.0001 | 0.1069 | 0.0002 | 0.1866          | 0.0094 | 1.3772 | 0.1054 | 5.1726    | 1.2527 |
| 0.926      | 0.6996 | 0.0001 | 0.1076 | 0.0002 | 0.1920          | 0.0105 | 1.1287 | 0.0972 | 1.2337    | 1.1855 |
| 0.928      | 0.6982 | 0.0001 | 0.1086 | 0.0002 | 0.1994          | 0.0095 | 1.1381 | 0.0934 | 4.4043    | 1.3107 |
| 0.930      | 0.6973 | 0.0001 | 0.1097 | 0.0002 | 0.1941          | 0.0092 | 1.2723 | 0.1101 | 5.0363    | 1.1734 |

Table S5: Simulation results for the transport properties near the critical solution point of the equimolar mixture C at  $p=0.0724$ . Temperature  $T$ , density  $\rho$ , MS  $D_{ij}^\infty$  and self-diffusion coefficient  $D_i$  as well as the shear viscosity  $\eta$  and thermal conductivity  $\lambda$  are tabulated. Results correspond to four system sizes  $N = 2500, 5000, 10,000$  and  $20,000$ .

| $T$          | $\rho$ | err    | $D_i$  | err    | $D_{ij}^\infty$ | err    | $\eta$ | err    | $\lambda$ | err    |
|--------------|--------|--------|--------|--------|-----------------|--------|--------|--------|-----------|--------|
| $N = 5000$   |        |        |        |        |                 |        |        |        |           |        |
| 0.906        | 0.7124 | 0.0001 | 0.1002 | 0.0001 | 0.2133          | 0.0094 | 1.2372 | 0.0861 | 4.7805    | 0.7998 |
| 0.908        | 0.7109 | 0.0001 | 0.1013 | 0.0001 | 0.2233          | 0.0099 | 1.0575 | 0.0738 | 4.2165    | 0.7059 |
| 0.910        | 0.7098 | 0.0001 | 0.1020 | 0.0001 | 0.1936          | 0.0074 | 1.3337 | 0.0912 | 3.6371    | 0.6922 |
| 0.912        | 0.7085 | 0.0001 | 0.1029 | 0.0001 | 0.1867          | 0.0077 | 1.2679 | 0.0792 | 3.9024    | 0.7111 |
| 0.914        | 0.7074 | 0.0001 | 0.1037 | 0.0001 | 0.2393          | 0.0106 | 1.1335 | 0.0787 | 3.9404    | 0.7066 |
| 0.916        | 0.7060 | 0.0001 | 0.1046 | 0.0001 | 0.1954          | 0.0068 | 1.0919 | 0.0685 | 3.8630    | 0.6551 |
| 0.918        | 0.7049 | 0.0001 | 0.1054 | 0.0001 | 0.2149          | 0.0087 | 1.0759 | 0.0769 | 3.6055    | 0.6627 |
| 0.920        | 0.7035 | 0.0001 | 0.1060 | 0.0001 | 0.1922          | 0.0077 | 1.3719 | 0.0857 | 4.3032    | 0.7046 |
| 0.922        | 0.7021 | 0.0001 | 0.1074 | 0.0001 | 0.1964          | 0.0069 | 1.0965 | 0.0742 | 4.0943    | 0.6948 |
| 0.924        | 0.7010 | 0.0001 | 0.1078 | 0.0001 | 0.2161          | 0.0083 | 1.1213 | 0.0646 | 2.9579    | 0.6768 |
| 0.926        | 0.6996 | 0.0001 | 0.1091 | 0.0001 | 0.1839          | 0.0076 | 1.0894 | 0.0628 | 2.9590    | 0.6176 |
| 0.928        | 0.6982 | 0.0001 | 0.1099 | 0.0001 | 0.2055          | 0.0087 | 1.3053 | 0.0825 | 3.9005    | 0.7017 |
| 0.930        | 0.6973 | 0.0001 | 0.1110 | 0.0001 | 0.2293          | 0.0089 | 1.2875 | 0.0902 | 4.8002    | 0.6876 |
| $N = 10,000$ |        |        |        |        |                 |        |        |        |           |        |
| 0.906        | 0.7124 | 0.0001 | 0.1012 | 0.0001 | 0.2254          | 0.0095 | 1.2244 | 0.0801 | 5.4210    | 0.7538 |
| 0.908        | 0.7109 | 0.0001 | 0.1024 | 0.0001 | 0.2180          | 0.0089 | 1.0935 | 0.0752 | 4.2867    | 0.7476 |
| 0.910        | 0.7098 | 0.0001 | 0.1030 | 0.0001 | 0.2160          | 0.0104 | 1.3169 | 0.0862 | 4.3253    | 0.7369 |
| 0.912        | 0.7085 | 0.0001 | 0.1040 | 0.0001 | 0.2226          | 0.0100 | 1.1848 | 0.0798 | 5.0099    | 0.7651 |
| 0.914        | 0.7074 | 0.0001 | 0.1048 | 0.0001 | 0.2047          | 0.0078 | 1.1546 | 0.0849 | 3.6872    | 0.7344 |
| 0.916        | 0.7060 | 0.0001 | 0.1056 | 0.0001 | 0.2199          | 0.0093 | 1.2685 | 0.0841 | 3.9112    | 0.7382 |
| 0.918        | 0.7049 | 0.0001 | 0.1064 | 0.0001 | 0.2183          | 0.0093 | 1.0537 | 0.0683 | 5.2886    | 0.7360 |
| 0.920        | 0.7035 | 0.0001 | 0.1076 | 0.0001 | 0.2398          | 0.0096 | 0.9808 | 0.0694 | 5.1168    | 0.7123 |
| 0.922        | 0.7021 | 0.0001 | 0.1084 | 0.0001 | 0.2192          | 0.0102 | 1.3261 | 0.0955 | 3.1974    | 0.7281 |
| 0.924        | 0.7010 | 0.0001 | 0.1092 | 0.0001 | 0.2133          | 0.0079 | 1.1187 | 0.0693 | 4.4133    | 0.6808 |
| 0.926        | 0.6996 | 0.0001 | 0.1098 | 0.0001 | 0.2153          | 0.0090 | 1.2652 | 0.0859 | 4.8182    | 0.7424 |
| 0.928        | 0.6982 | 0.0001 | 0.1110 | 0.0001 | 0.2016          | 0.0083 | 1.0878 | 0.0719 | 3.7182    | 0.6726 |
| 0.930        | 0.6973 | 0.0001 | 0.1118 | 0.0001 | 0.2382          | 0.0105 | 1.1326 | 0.0767 | 4.5748    | 0.6961 |
| $N = 20,000$ |        |        |        |        |                 |        |        |        |           |        |
| 0.906        | 0.7124 | 0.0001 | 0.1021 | 0.0001 | 0.2343          | 0.0139 | 1.1373 | 0.0930 | 4.4854    | 1.6365 |
| 0.908        | 0.7109 | 0.0001 | 0.1032 | 0.0001 | 0.2196          | 0.0140 | 1.3221 | 0.1126 | 6.7936    | 1.8967 |
| 0.910        | 0.7098 | 0.0001 | 0.1038 | 0.0001 | 0.2142          | 0.0113 | 1.2914 | 0.1406 | 4.3375    | 1.8188 |
| 0.912        | 0.7085 | 0.0001 | 0.1045 | 0.0001 | 0.2449          | 0.0139 | 1.4212 | 0.0985 | 4.1932    | 1.6094 |
| 0.914        | 0.7074 | 0.0001 | 0.1056 | 0.0001 | 0.2500          | 0.0144 | 1.1567 | 0.1116 | 2.8314    | 1.8733 |
| 0.916        | 0.7060 | 0.0001 | 0.1065 | 0.0001 | 0.2350          | 0.0127 | 1.1818 | 0.0993 | 3.1328    | 1.8003 |
| 0.918        | 0.7049 | 0.0001 | 0.1073 | 0.0001 | 0.2426          | 0.0141 | 1.2489 | 0.0968 | 4.8839    | 1.9031 |
| 0.920        | 0.7035 | 0.0001 | 0.1082 | 0.0001 | 0.2486          | 0.0142 | 0.8571 | 0.0708 | 3.6804    | 1.6528 |
| 0.922        | 0.7021 | 0.0001 | 0.1090 | 0.0001 | 0.2440          | 0.0128 | 1.0814 | 0.1186 | 5.5139    | 1.7003 |
| 0.924        | 0.7010 | 0.0001 | 0.1097 | 0.0001 | 0.2181          | 0.0108 | 1.1194 | 0.1159 | 9.0988    | 1.8116 |
| 0.926        | 0.6996 | 0.0001 | 0.1110 | 0.0001 | 0.2555          | 0.0154 | 1.2953 | 0.1365 | -0.0882   | 1.8307 |
| 0.928        | 0.6982 | 0.0001 | 0.1119 | 0.0001 | 0.2390          | 0.0159 | 1.0044 | 0.0949 | 1.8810    | 1.7731 |
| 0.930        | 0.6973 | 0.0001 | 0.1126 | 0.0001 | 0.2338          | 0.0151 | 1.3080 | 0.1225 | 4.3251    | 1.8015 |

### 4.3.5 UCST

Table S6: Simulation results for the UCST of mixtures B to D. Temperature  $T$ , pressure  $p$  and mole fraction  $x_1$  are tabulated, where L1 and L2 denote the two liquid phases.

| $\xi$ | $T$  | $p$    | $x_1^{L1}$ | $x_1^{L2}$ | $\xi$ | $T$  | $p$    | $x_1^{L1}$ | $x_1^{L2}$ |
|-------|------|--------|------------|------------|-------|------|--------|------------|------------|
| 0.80  | 0.90 | 0.0036 | 0.5        | 0.5        | 0.75  | 1.01 | 0.0724 | 0.5        | 0.5        |
| 0.80  | 0.90 | 0.0072 | 0.5        | 0.5        | 0.75  | 1.01 | 0.1000 | 0.5        | 0.5        |
| 0.80  | 0.90 | 0.0145 | 0.5        | 0.5        | 0.75  | 1.02 | 0.1253 | 0.5        | 0.5        |
| 0.80  | 0.90 | 0.0181 | 0.5        | 0.5        | 0.75  | 1.03 | 0.1499 | 0.5        | 0.5        |
| 0.80  | 0.90 | 0.0217 | 0.5        | 0.5        |       |      |        | 0.5        | 0.5        |
| 0.80  | 0.90 | 0.0254 | 0.5        | 0.5        | 0.85  | 0.77 | 0.0059 | 0.5        | 0.5        |
| 0.80  | 0.90 | 0.0290 | 0.5        | 0.5        | 0.85  | 0.77 | 0.0072 | 0.5        | 0.5        |
| 0.80  | 0.91 | 0.0435 | 0.5        | 0.5        | 0.85  | 0.77 | 0.0077 | 0.5        | 0.5        |
| 0.80  | 0.91 | 0.0579 | 0.5        | 0.5        | 0.85  | 0.78 | 0.0097 | 0.5        | 0.5        |
| 0.80  | 0.91 | 0.0724 | 0.5        | 0.5        | 0.85  | 0.78 | 0.0120 | 0.5        | 0.5        |
| 0.80  | 0.91 | 0.1014 | 0.5        | 0.5        | 0.85  | 0.78 | 0.0145 | 0.5        | 0.5        |
| 0.80  | 0.91 | 0.0869 | 0.5        | 0.5        | 0.85  | 0.78 | 0.0146 | 0.5        | 0.5        |
| 0.80  | 0.91 | 0.1086 | 0.5        | 0.5        | 0.85  | 0.78 | 0.0175 | 0.5        | 0.5        |
| 0.80  | 0.92 | 0.1449 | 0.5        | 0.5        | 0.85  | 0.78 | 0.0217 | 0.5        | 0.5        |
| 0.80  | 0.92 | 0.1811 | 0.5        | 0.5        |       |      |        |            |            |
| 0.80  | 0.93 | 0.2173 | 0.5        | 0.5        |       |      |        |            |            |
| 0.80  | 0.93 | 0.2535 | 0.5        | 0.5        |       |      |        |            |            |

## References

- (S1) Deublein, S.; Eckl, B.; Stoll, J.; Lishchuk, S. V.; Guevara-Carrion, G.; Glass, C. W.; Merker, T.; Bernreuther, M.; Hasse, H.; Vrabec, J. ms2: A molecular simulation tool for thermodynamic properties. *Computer Physics Communications* **2011**, *182*, 2350–2367.
- (S2) Glass, C. W.; Reiser, S.; Rutkai, G.; Deublein, S.; Köster, A.; Guevara-Carrion, G.; Wafai, A.; Horsch, M.; Bernreuther, M.; Windmann, T.; Hasse, H.; Vrabec, J. ms2: A molecular simulation tool for thermodynamic properties, new version release. *Computer Physics Communications* **2014**, *185*, 3302–3306.
- (S3) Rutkai, G.; Köster, A.; Guevara-Carrion, G.; Janzen, T.; Schappals, M.; Glass, C. W.; Bernreuther, M.; Wafai, A.; Stephan, S.; Kohns, M.; Reiser, S.; Deublein, S.; Horsch, M.; Hasse, H.; Vrabec, J. ms2: A molecular simulation tool for thermodynamic properties, release 3.0. *Computer Physics Communications* **2017**, *221*, 343–351.
- (S4) Fingerhut, R.; Guevara-Carrion, G.; Nitzke, I.; Saric, D.; Marx, J.; Langenbach, K.; Prokopev, S.; Celný, D.; Bernreuther, M.; Stephan, S.; Kohns, M.; Hasse, H.; Vrabec, J. ms2: A molecular simulation tool for thermodynamic properties, release 4.0. *Computer Physics Communications* **2021**, *262*, 107860.
- (S5) Lustig, R. Angle-average for the powers of the distance between two separated vectors. *Molecular Physics* **1988**, *65*, 175–179.
- (S6) Widom, B. Some Topics in the Theory of Fluids. *The Journal of Chemical Physics* **1963**, *39*, 2808–2812.
- (S7) Vrabec, J.; Hasse, H. Grand Equilibrium: vapour-liquid equilibria by a new molecular simulation method. *Molecular Physics* **2002**, *100*, 3375–3383.



- (S8) Kirkwood, J. G.; Buff, F. P. The Statistical Mechanical Theory of Solutions. I. *The Journal of Chemical Physics* **1951**, *19*, 774–777.
- (S9) Thol, M.; Rutkai, G.; Köster, A.; Lustig, R.; Span, R.; Vrabec, J. Equation of State for the Lennard-Jones Fluid. *Journal of Physical and Chemical Reference Data* **2016**, *45*, 023101.
- (S10) Stephan, S.; Staubach, J.; Hasse, H. Review and comparison of equations of state for the Lennard-Jones fluid. *Fluid Phase Equilibria* **2020**, *523*, 112772.
- (S11) Span, R. *Multiparameter Equations of State*; Springer: Berlin, 2000.
- (S12) Krüger, P.; Schnell, S. K.; Bedeaux, D.; Kjelstrup, S.; Vlugt, T. J. H.; Simon, J.-M. Kirkwood-Buff Integrals for Finite Volumes. *The Journal of Physical Chemistry Letters* **2013**, *4*, 235–238.
- (S13) Ganguly, P.; van der Vegt, N. F. A. Convergence of Sampling Kirkwood-Buff Integrals of Aqueous Solutions with Molecular Dynamics Simulations. *Journal of Chemical Theory and Computation* **2013**, *9*, 1347–1355.
- (S14) Fingerhut, R.; Vrabec, J. Kirkwood-Buff integration: A promising route to entropic properties? *Fluid Phase Equilibria* **2019**, *485*, 270–281.
- (S15) Krishna, R. Problems and pitfalls in the use of the fick formulation for intraparticle diffusion. *Chemical Engineering Science* **1993**, *48*, 845–861.
- (S16) Kolafa, J.; Nezbeda, I. The Lennard-Jones fluid: an accurate analytic and theoretically-based equation of state. *Fluid Phase Equilibria* **1994**, *100*, 1–34.
